# Supplementary material for: Luminescence color change of [3,4-difluoro-2,6-bis(5-methyl-2-pyridyl)phenyl-κ3N,C1,N′]cyanidoplatinum(ii) by aggregation
Source: Royal Society of Chemistry journal article supplement (doi:10.1039/d2dt02360a), 2022-01-01

## Luminescence color change of [3,4-difluoro-2,6-bis(5-methyl-2-pyridyl)phenyl- $\kappa^3N,C^1,N'$ ]cyanidoplatinum(II) by aggregation

Shingo Hattori,<sup>a</sup> Takumi Nakano,<sup>a</sup> Nanako Kobayashi,<sup>a</sup> Yuri Konno,<sup>a</sup> Eiji Nishibori,<sup>b</sup> Tomasz Galica<sup>b</sup> and Kazuteru Shinozaki<sup>\*a</sup>

<sup>a</sup>Department of Material Science, Graduate School of Nanobiosystem Science, Yokohama City University, 22-2 Seto, Yokohama 236-0027, Japan

<sup>b</sup>Department of Physics, Faculty of Pure and Applied Sciences, University of Tsukuba, 1-1-1 Tennodai, Tsukuba, Ibaraki 305-8571, Japan

**Table S1.** Color and luminescence color variations for Pt(L)CN upon exposure to solvent vapor.

| vapor                             | CHCl <sub>3</sub>                                                                   | CH <sub>2</sub> Cl <sub>2</sub>                                                      | No vapor                                                                              |
|-----------------------------------|-------------------------------------------------------------------------------------|--------------------------------------------------------------------------------------|---------------------------------------------------------------------------------------|
| Color                             |  |  |  |
| Luminescence color under UV light |  |  |  |

**Table S2.** Crystal data, bond lengths and bond angles for Pt(L)CN·2CHCl<sub>3</sub> crystal.

|                          |                                                                                     |
|--------------------------|-------------------------------------------------------------------------------------|
| Space group              | <i>P2<sub>1</sub>/m</i>                                                             |
| Formulas                 | C <sub>21</sub> H <sub>15</sub> Cl <sub>6,12</sub> F <sub>2</sub> N <sub>3</sub> Pt |
| Crystal system           | Monoclinic                                                                          |
| <i>a</i> /Å              | 13.7207(16)                                                                         |
| <i>b</i> /Å              | 6.8784(6)                                                                           |
| <i>c</i> /Å              | 28.022(2)                                                                           |
| <i>α</i> /°              | 90                                                                                  |
| <i>β</i> /°              | 102.154                                                                             |
| <i>γ</i> /°              | 90                                                                                  |
| <i>V</i> /Å <sup>3</sup> | 2585.34                                                                             |
| <i>Z</i> , <i>Z</i> '    | <i>Z</i> :4, <i>Z</i> ':1                                                           |
| <i>R</i> /%              | 7.97                                                                                |

|         | Bond length / Å |             | Bond angle /° |
|---------|-----------------|-------------|---------------|
| Pt1-N3  | 1.88            | N3-Pt1-N5   | 163.1         |
| Pt1-N5  | 2.07            | N5-Pt1-C9   | 82.4          |
| Pt1-C1  | 2.08            | C9-Pt1-N3   | 81.0          |
| Pt1-C9  | 1.98            | N3-Pt1-C1   | 99.9          |
| Pt2-N4  | 2.06            | C1-Pt1-N5   | 97.0          |
| Pt2-N6  | 2.07            | C1-Pt1-C9   | 179.3         |
| Pt2-C20 | 2.05            | N4-Pt2-N6   | 162.9         |
| Pt2-C28 | 1.91            | N6-Pt2-C28  | 81.6          |
|         |                 | C28-Pt2-N4  | 81.3          |
|         |                 | N4-Pt2-C20  | 99.0          |
|         |                 | C20-Pt2-N6  | 98.2          |
|         |                 | C20-Pt2-C28 | 179.8         |
|         |                 |             |               |

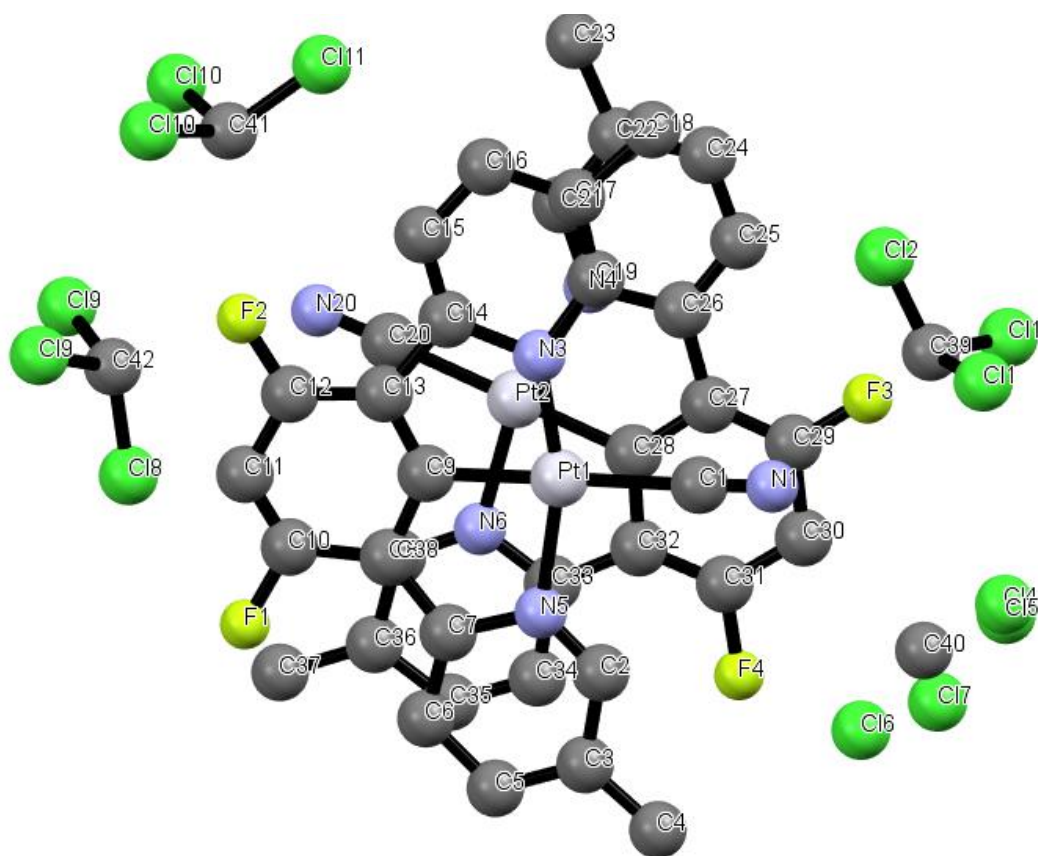

**Figure S1.** Structure of Pt(L)CN·2CHC

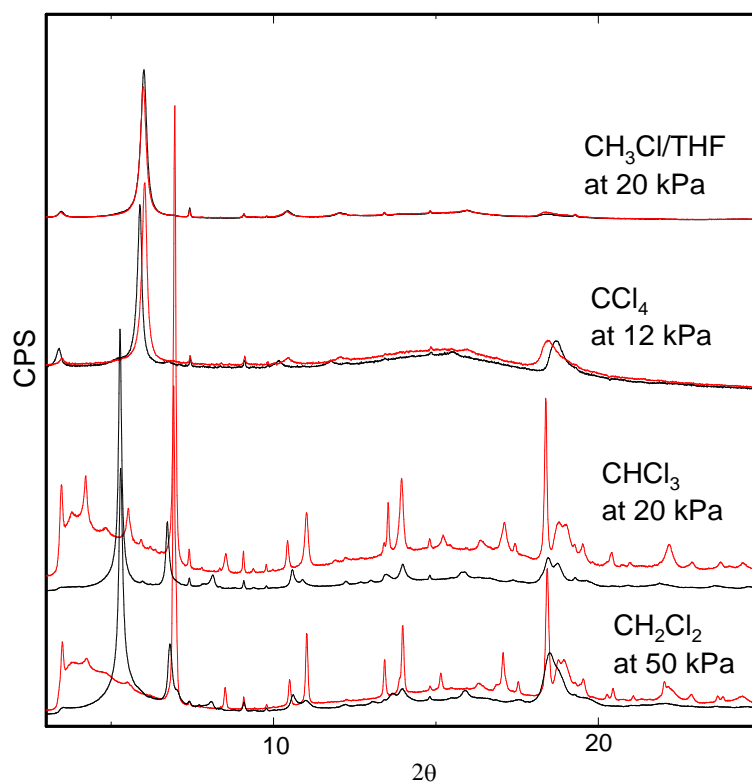

**Figure S2.** Red lines are PXRD patterns for Pt(L)CN crystal upon exposure to vapors. THF solution of CH<sub>3</sub>Cl is employed for the exposure to CH<sub>3</sub>Cl vapor. Black lines are respective PXRD patterns after evacuation.

For the CHCl<sub>3</sub> and CH<sub>2</sub>Cl<sub>2</sub> adsorbed crystals, the PXRD patterns are very similar to each other. The peaks seem to be identical to each other within the experimental error. For the angles  $2\theta = 18.38^\circ$  (CHCl<sub>3</sub>) and  $18.43^\circ$  (CH<sub>2</sub>Cl<sub>2</sub>) providing distinct intense peak are transformed into 3.38 and 3.37 Å from the Bragg's law, respectively, which would correspond to the interplane separation between Pt(L)CN stacking pair. It seems that CH<sub>3</sub>Cl in THF vapor doesn't contribute to the change in PXRD pattern. While the slight change in pattern can be seen upon exposure to CCl<sub>4</sub> vapor, the pattern is very different from those of CHCl<sub>3</sub> and CH<sub>2</sub>Cl<sub>2</sub> adsorbed crystals.

**Scheme S1.** Synthesis of Pt(L)CN.

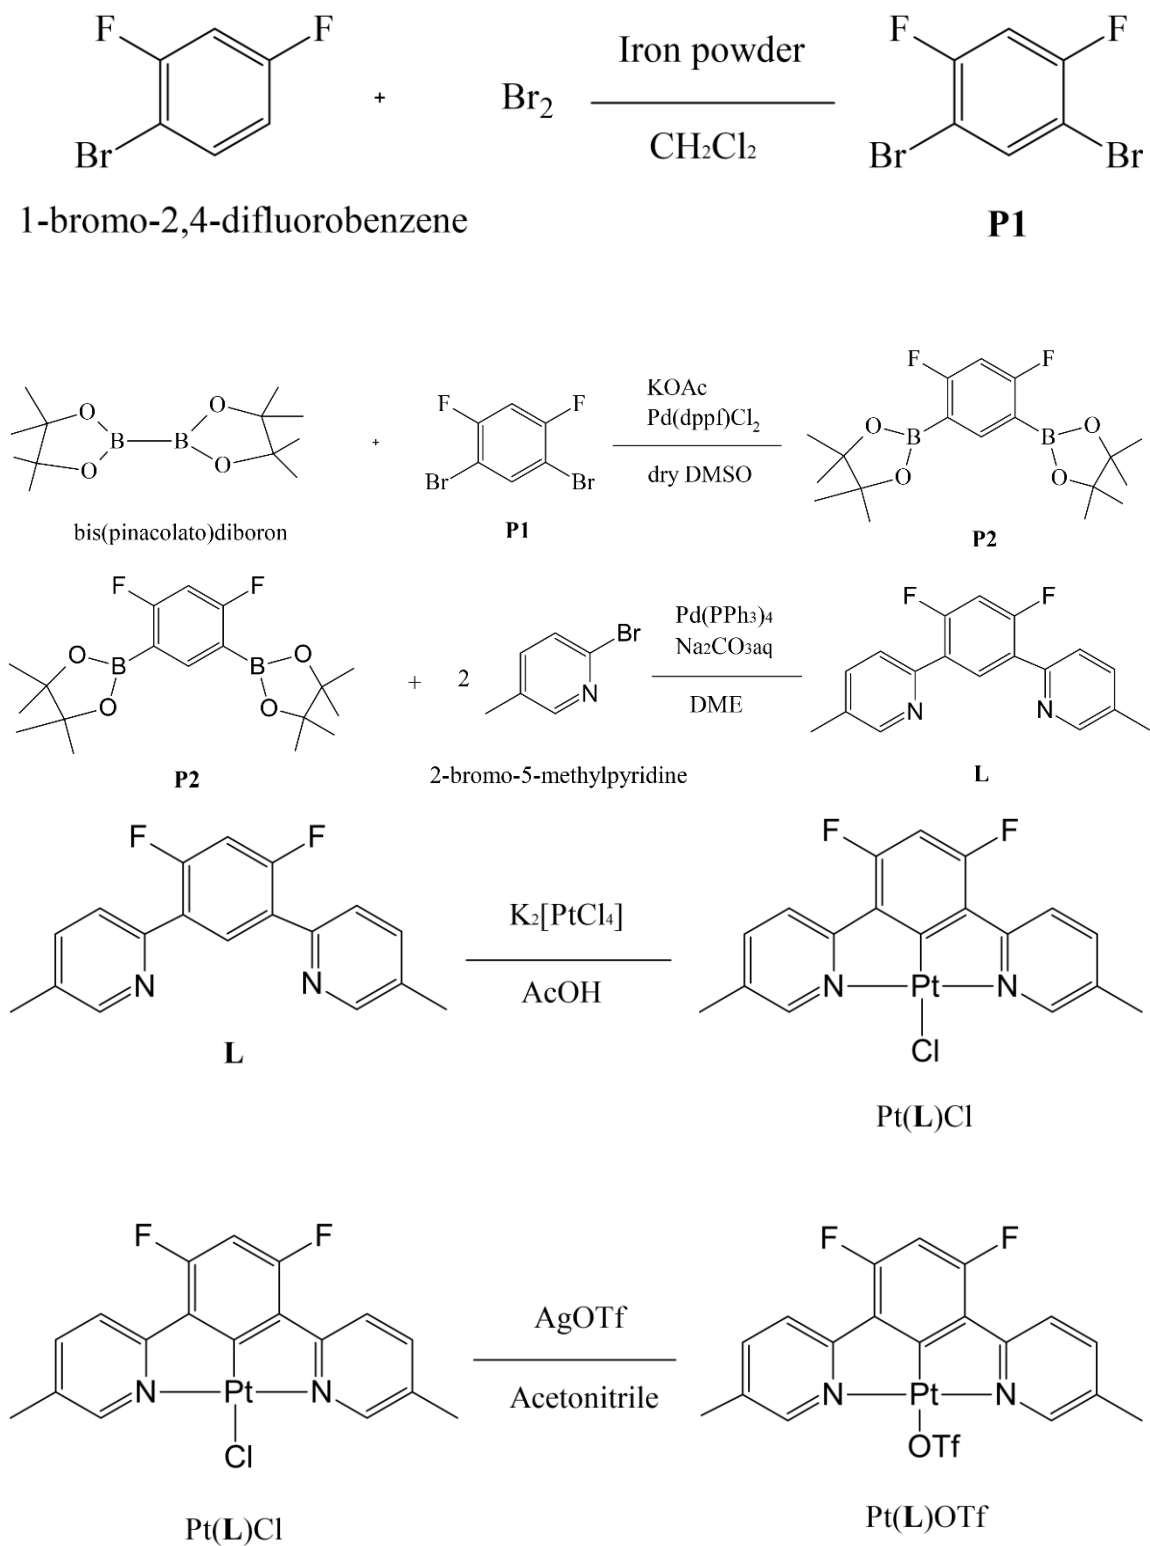

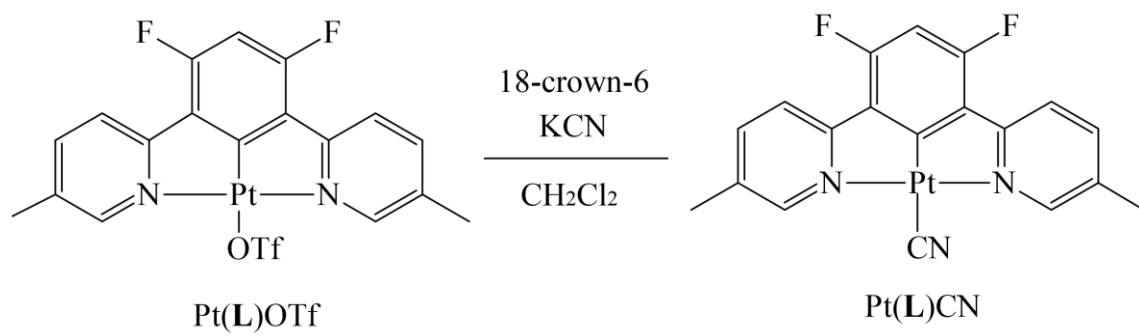

Supplement: d2dt02360a1.pdf [file d2dt02360a1.pdf]
